# Supplementary material
Source: HighWire-hosted journal article supplement (https://bmjopenquality.bmj.com/content/7/4/e000193)
Supplement: inline-supplementary-material-1 [file inline-supplementary-material-1.docx]

Appendix: B

Search Strategy

The search was translated into all of the databases based off this strategy.

**Medline/PubMed, National Library of Medicine (1940 – 2015)**

(((("Pharmacy"[Mesh] OR "Pharmacies"[Mesh] OR Pharmacy[ALL] OR Pharmacies[ALL] OR "Pharmacists"[Mesh] OR pharmacist*[ALL]))) AND (("Community Pharmacy Services"[Mesh] OR "Ambulatory Care Facilities"[Mesh] OR "Outpatients"[Mesh] OR "Community pharmacy"[ALL] OR "community pharmacies"[ALL] OR ambulatory[ALL] OR "outpatient clinic"[ALL] OR outpatient*[ALL] OR outpatient pharmacy[ALL]))) AND ((("Medication Errors"[Mesh] OR "Polypharmacy"[Mesh] OR "Drug Interactions"[Mesh] OR "Adverse Drug Reaction Reporting Systems"[Mesh] OR "Risk Management"[Mesh] OR "Patient Safety"[Mesh] OR adverse[ALL] OR adverse effect*[ALL] OR "adverse drug events"[ALL] OR "adverse drug event"[ALL] OR "adverse drug effects"[ALL] OR "adverse drug effect"[ALL] OR drug-related[ALL] OR drug reaction*[ALL] OR drug interaction*[ALL] AND drug-drug interaction*[ALL] OR "drug drug interaction"[ALL] OR "drug drug interactions"[ALL] OR "drug safety"[ALL] OR "drug monitoring"[ALL] OR dispensing error[ALL] OR dispensing error*[ALL] OR contraindication*[ALL] OR contraindicated[ALL] OR inappropriate prescribing[ALL] OR inappropriate medication[ALL] OR drug error*[ALL] OR medication error*[ALL] OR polypharmacy[ALL] OR drug risk*[ALL] OR "quality assurance"[ALL] OR "quality assessment"[ALL] OR quality improvement[ALL] OR continuous quality improvement[ALL] OR prescription error*[ALL] OR prescribing error*[ALL] OR drug dispensing error*[ALL] OR error rate[ALL] OR wrong dose[ALL] OR incorrect dose[ALL] OR wrong dosage[ALL] OR wrong dosage form[ALL] OR incorrect dosage[ALL] OR prescription dose[ALL] OR prescription quantity error[ALL] OR prescription dispensing error[ALL] OR prescription input error[ALL] OR filling label error*[ALL] OR filling error[ALL] OR label error[ALL] OR input error*[ALL] OR order entry error*[ALL] OR e-prescribing error*[ALL] OR preventable adverse drug events*[ALL] OR avoidable drug reaction*[ALL] OR avoidable entry error*[ALL] OR near miss[ALL] OR incorrect refill[ALL] OR inappropriate refill[ALL] OR wrong refill[ALL] OR wrong date[ALL] OR incorrect date[ALL] OR wrong prescriber[ALL] OR wrong day supply[ALL] OR wrong formulation[ALL] OR incorrect formulation[ALL] OR wrong strength[ALL] OR incorrect strength[ALL] OR drug allergy[ALL] OR inappropriate therapy[ALL] OR duplicate therapy[ALL] OR drug utilization review[ALL])))
